# Supplementary material for: Neural mechanisms of modulations of empathy and altruism by beliefs of others’ pain
Source: eLife. 2021 Aug 9;10:e66043. doi: 10.7554/eLife.66043 (PMC8373377; doi:10.7554/eLife.66043)
Supplement: Appendix 1—figure 1—source data 1. [file elife-66043-app1-fig1-data1.xlsx]

## Sheet: Happy Intensity
	Awardee_Neutral Expression	Awardee_Happy Expression	Actor/Actress_Neutral Expression	Actor/Actress_Happy Expression
sub01	2.125	5.75	1	3.25
sub02	2	6.25	1.875	4.25
sub03	1.875	6.5	1.5	6
sub04	2.25	5.75	2.5	5.25
sub05	1.375	6	1.25	5
sub06	2.25	6	2.625	5.875
sub07	4.125	5.75	3.125	5.125
sub08	1.875	4.875	2	5.375
sub09	2.875	6.25	3	6.25
sub10	3	6	3.125	5.25
sub11	1	4.5	1.125	4.125
sub12	1.75	5.375	1.375	5.125
sub13	4	5.625	3.75	5.5
sub14	2.375	5.75	1.625	4.625
sub15	1.875	4.5	1.375	3.5
sub16	2.5	5.75	1.375	5.625
sub17	3.625	6.375	1.5	2.75
sub18	3.25	6.5	1.875	5
sub19	2	6	1.875	5.625
sub20	1.75	6.125	1.5	6.125
sub21	1.25	4.375	1.25	4.625
sub22	3.625	5.875	4	5.875
sub23	3.5	5.625	3.375	5.25
sub24	2	5.125	1.25	4.75
sub25	1.375	4.5	1.25	2.875
sub26	3.75	5.75	3.75	5.875
sub27	3.625	5.75	2.625	4.75
sub28	3.75	6	3.375	5.625
sub29	3.5	6.125	3	5.75
sub30	1.5	4.375	1.125	3.625

## Sheet: P570 Amplitudes
	Awardee_Neutral Expression	Awardee_Happy Expression	Actor/Actress_Neutral Expression	Actor/Actress_Happy Expression
sub01	0.6737	2.6932	3.5463	2.3234
sub02	5.0453	5.1775	4.376	4.3933
sub03	5.3049	5.9465	6.1496	7.0574
sub04	0.6396	1.3815	1.7943	2.5812
sub05	5.7103	4.8156	4.3881	4.2026
sub06	5.5862	5.1751	5.9375	5.2606
sub07	8.1248	7.7692	7.5943	7.6872
sub08	3.9422	4.2981	3.73	4.7848
sub09	6.3405	5.9557	4.3882	5.5717
sub10	9.9783	11.467	9.2012	9.3301
sub11	8.5504	9.3458	8.3619	9.0584
sub12	1.9878	1.6263	0.7838	0.9077
sub13	3.3369	4.6872	3.6822	3.1042
sub14	3.4751	4.285	4.5175	4.8125
sub15	5.8683	6.8449	6.27	6.101
sub16	8.108	7.993	8.1806	8.1823
sub17	3.2489	3.7302	1.7143	1.2955
sub18	4.7062	5.9855	5.0733	5.0594
sub19	5.2864	6.2299	5.7633	5.5279
sub20	1.0774	2.5082	1.1204	1.466
sub21	4.8024	5.2164	5.7392	6.1611
sub22	4.255	4.202	4.6465	5.2883
sub23	5.0114	7.4173	6.1855	6.495
sub24	3.9081	5.6822	3.1033	4.2583
sub25	6.1969	6.9304	7.3356	5.6007
sub26	5.0465	6.1814	4.6848	5.7577
sub27	4.5367	4.7207	3.7241	3.5532
sub28	3.8168	3.9701	2.708	3.9462
sub29	2.6266	5.0072	3.9104	4.7862
sub30	3.103	4.1263	2.2536	3.9464
