# Supplementary material for: Neural mechanisms of modulations of empathy and altruism by beliefs of others’ pain
Source: eLife. 2021 Aug 9;10:e66043. doi: 10.7554/eLife.66043 (PMC8373377; doi:10.7554/eLife.66043)
Supplement: Figure 2—source data 1. [file elife-66043-fig2-data1.csv]

subID	condition	Time	dat
1	Patient	round_1st	6.5
2	Patient	round_1st	2
3	Patient	round_1st	1.25
4	Patient	round_1st	6.25
5	Patient	round_1st	4.125
6	Patient	round_1st	6.125
7	Patient	round_1st	6.5
8	Patient	round_1st	7
9	Patient	round_1st	5.75
10	Patient	round_1st	4.875
11	Patient	round_1st	3.75
12	Patient	round_1st	4.5
13	Patient	round_1st	4.375
14	Patient	round_1st	6.625
15	Patient	round_1st	6.25
16	Patient	round_1st	4.125
17	Patient	round_1st	4.625
18	Patient	round_1st	4.75
19	Patient	round_1st	2.75
20	Patient	round_1st	5.875
21	Patient	round_1st	4.125
22	Patient	round_1st	5.125
23	Patient	round_1st	2.75
24	Patient	round_1st	6.625
25	Patient	round_1st	6.625
26	Patient	round_1st	4.125
27	Patient	round_1st	6.25
28	Patient	round_1st	4.125
29	Patient	round_1st	2.75
30	Patient	round_1st	4.75
31	Patient	round_1st	6.5
32	Patient	round_1st	6.875
33	Patient	round_1st	7.25
34	Patient	round_1st	7.875
35	Patient	round_1st	5.125
36	Patient	round_1st	3.375
37	Patient	round_1st	7.125
38	Patient	round_1st	8.25
39	Patient	round_1st	8.375
40	Patient	round_1st	7.375
41	Patient	round_1st	7.375
42	Patient	round_1st	6.375
43	Patient	round_1st	6.5
44	Patient	round_1st	7.875
45	Patient	round_1st	7.5
46	Patient	round_1st	3
47	Patient	round_1st	8.5
48	Patient	round_1st	8.125
49	Patient	round_1st	5.75
50	Patient	round_1st	3.375
51	Patient	round_1st	3.5
52	Patient	round_1st	7.125
53	Patient	round_1st	7.375
54	Patient	round_1st	8.75
55	Patient	round_1st	6
56	Patient	round_1st	7.25
57	Patient	round_1st	6
58	Patient	round_1st	6.125
59	Patient	round_1st	6
60	Patient	round_1st	7
1	Actor	round_1st	6.25
2	Actor	round_1st	2.5
3	Actor	round_1st	2.25
4	Actor	round_1st	7.375
5	Actor	round_1st	3.5
6	Actor	round_1st	6.75
7	Actor	round_1st	7.25
8	Actor	round_1st	6.25
9	Actor	round_1st	5.375
10	Actor	round_1st	4.5
11	Actor	round_1st	3.25
12	Actor	round_1st	5.5
13	Actor	round_1st	3.625
14	Actor	round_1st	7.375
15	Actor	round_1st	5.625
16	Actor	round_1st	5.25
17	Actor	round_1st	5
18	Actor	round_1st	4.5
19	Actor	round_1st	3.875
20	Actor	round_1st	6.875
21	Actor	round_1st	5
22	Actor	round_1st	5.25
23	Actor	round_1st	3.75
24	Actor	round_1st	7
25	Actor	round_1st	6.625
26	Actor	round_1st	3.75
27	Actor	round_1st	5.5
28	Actor	round_1st	3.875
29	Actor	round_1st	3
30	Actor	round_1st	3.375
31	Actor	round_1st	6.25
32	Actor	round_1st	6.625
33	Actor	round_1st	7
34	Actor	round_1st	7.625
35	Actor	round_1st	5.25
36	Actor	round_1st	2.5
37	Actor	round_1st	6.625
38	Actor	round_1st	6.625
39	Actor	round_1st	8.5
40	Actor	round_1st	6.625
41	Actor	round_1st	6.75
42	Actor	round_1st	6.625
43	Actor	round_1st	6.625
44	Actor	round_1st	7.875
45	Actor	round_1st	7.25
46	Actor	round_1st	3.5
47	Actor	round_1st	7.875
48	Actor	round_1st	8
49	Actor	round_1st	5.125
50	Actor	round_1st	2.875
51	Actor	round_1st	3.25
52	Actor	round_1st	7.375
53	Actor	round_1st	7.25
54	Actor	round_1st	8.125
55	Actor	round_1st	6
56	Actor	round_1st	6.5
57	Actor	round_1st	5.125
58	Actor	round_1st	6.125
59	Actor	round_1st	5.625
60	Actor	round_1st	7.875
1	Patient	round_2nd	8
2	Patient	round_2nd	7
3	Patient	round_2nd	1
4	Patient	round_2nd	7.375
5	Patient	round_2nd	3.25
6	Patient	round_2nd	7.375
7	Patient	round_2nd	8.25
8	Patient	round_2nd	8
9	Patient	round_2nd	6.625
10	Patient	round_2nd	6.125
11	Patient	round_2nd	5.375
12	Patient	round_2nd	4.625
13	Patient	round_2nd	5.375
14	Patient	round_2nd	7.25
15	Patient	round_2nd	6.75
16	Patient	round_2nd	6.375
17	Patient	round_2nd	8.125
18	Patient	round_2nd	6.625
19	Patient	round_2nd	5.25
20	Patient	round_2nd	8.25
21	Patient	round_2nd	5.125
22	Patient	round_2nd	5.875
23	Patient	round_2nd	5.25
24	Patient	round_2nd	7
25	Patient	round_2nd	6.125
26	Patient	round_2nd	4.125
27	Patient	round_2nd	7
28	Patient	round_2nd	6.5
29	Patient	round_2nd	7.625
30	Patient	round_2nd	5
31	Patient	round_2nd	7.375
32	Patient	round_2nd	9
33	Patient	round_2nd	8.5
34	Patient	round_2nd	8
35	Patient	round_2nd	6.375
36	Patient	round_2nd	8
37	Patient	round_2nd	6.125
38	Patient	round_2nd	8
39	Patient	round_2nd	8.125
40	Patient	round_2nd	7.125
41	Patient	round_2nd	8.25
42	Patient	round_2nd	7.5
43	Patient	round_2nd	7.375
44	Patient	round_2nd	8
45	Patient	round_2nd	6.625
46	Patient	round_2nd	7.5
47	Patient	round_2nd	8.375
48	Patient	round_2nd	9.375
49	Patient	round_2nd	7
50	Patient	round_2nd	6.75
51	Patient	round_2nd	5
52	Patient	round_2nd	7.25
53	Patient	round_2nd	7.375
54	Patient	round_2nd	9.375
55	Patient	round_2nd	7.625
56	Patient	round_2nd	7.75
57	Patient	round_2nd	8.125
58	Patient	round_2nd	7.625
59	Patient	round_2nd	8
60	Patient	round_2nd	8
1	Actor	round_2nd	4.875
2	Actor	round_2nd	5.5
3	Actor	round_2nd	1.875
4	Actor	round_2nd	8
5	Actor	round_2nd	3.25
6	Actor	round_2nd	7.375
7	Actor	round_2nd	8.375
8	Actor	round_2nd	7.375
9	Actor	round_2nd	6.75
10	Actor	round_2nd	4
11	Actor	round_2nd	2.875
12	Actor	round_2nd	6.625
13	Actor	round_2nd	5
14	Actor	round_2nd	7.5
15	Actor	round_2nd	5.875
16	Actor	round_2nd	5.5
17	Actor	round_2nd	5.5
18	Actor	round_2nd	3
19	Actor	round_2nd	4.375
20	Actor	round_2nd	7.625
21	Actor	round_2nd	4.625
22	Actor	round_2nd	5.875
23	Actor	round_2nd	4.25
24	Actor	round_2nd	5.5
25	Actor	round_2nd	4.5
26	Actor	round_2nd	2.75
27	Actor	round_2nd	5.125
28	Actor	round_2nd	3.625
29	Actor	round_2nd	3.5
30	Actor	round_2nd	3.5
31	Actor	round_2nd	6.125
32	Actor	round_2nd	4.625
33	Actor	round_2nd	7
34	Actor	round_2nd	7.5
35	Actor	round_2nd	3.875
36	Actor	round_2nd	5.75
37	Actor	round_2nd	6.375
38	Actor	round_2nd	6.25
39	Actor	round_2nd	6.375
40	Actor	round_2nd	5.75
41	Actor	round_2nd	3.625
42	Actor	round_2nd	5.25
43	Actor	round_2nd	5.75
44	Actor	round_2nd	7.5
45	Actor	round_2nd	5.5
46	Actor	round_2nd	4.875
47	Actor	round_2nd	4.75
48	Actor	round_2nd	3
49	Actor	round_2nd	5
50	Actor	round_2nd	3.5
51	Actor	round_2nd	3.625
52	Actor	round_2nd	6.125
53	Actor	round_2nd	3.625
54	Actor	round_2nd	4.625
55	Actor	round_2nd	4.5
56	Actor	round_2nd	7.625
57	Actor	round_2nd	4.5
58	Actor	round_2nd	4.625
59	Actor	round_2nd	1.625
60	Actor	round_2nd	5.75
