# Supplementary material for: Neural mechanisms of modulations of empathy and altruism by beliefs of others’ pain
Source: eLife. 2021 Aug 9;10:e66043. doi: 10.7554/eLife.66043 (PMC8373377; doi:10.7554/eLife.66043)
Supplement: Figure 2—source data 3. [file elife-66043-fig2-data3.csv]

subID	condition	Time	dat
1	Patient	round_1st	6.375
2	Patient	round_1st	0.25
3	Patient	round_1st	0
4	Patient	round_1st	1.25
5	Patient	round_1st	0.125
6	Patient	round_1st	0
7	Patient	round_1st	1.125
8	Patient	round_1st	2
9	Patient	round_1st	4.25
10	Patient	round_1st	0.125
11	Patient	round_1st	3.375
12	Patient	round_1st	0.375
13	Patient	round_1st	1.75
14	Patient	round_1st	0.5
15	Patient	round_1st	4.875
16	Patient	round_1st	3.375
17	Patient	round_1st	1.125
18	Patient	round_1st	5.625
19	Patient	round_1st	0.125
20	Patient	round_1st	5
21	Patient	round_1st	0.375
22	Patient	round_1st	0
23	Patient	round_1st	0.5
24	Patient	round_1st	2.875
25	Patient	round_1st	10
26	Patient	round_1st	0.5
27	Patient	round_1st	1
28	Patient	round_1st	1.125
29	Patient	round_1st	0.625
30	Patient	round_1st	1.25
31	Patient	round_1st	1
32	Patient	round_1st	4.125
33	Patient	round_1st	5
34	Patient	round_1st	1.375
35	Patient	round_1st	0.375
36	Patient	round_1st	0.75
37	Patient	round_1st	1.375
38	Patient	round_1st	7
39	Patient	round_1st	7.125
40	Patient	round_1st	6.5
41	Patient	round_1st	6.875
42	Patient	round_1st	4.875
43	Patient	round_1st	8.875
44	Patient	round_1st	9.75
45	Patient	round_1st	0
46	Patient	round_1st	1.25
47	Patient	round_1st	9.75
48	Patient	round_1st	7.25
49	Patient	round_1st	4.125
50	Patient	round_1st	0
51	Patient	round_1st	5
52	Patient	round_1st	7.125
53	Patient	round_1st	5.625
54	Patient	round_1st	1.875
55	Patient	round_1st	5.5
56	Patient	round_1st	10
57	Patient	round_1st	5
58	Patient	round_1st	5
59	Patient	round_1st	6.125
60	Patient	round_1st	7.625
1	Actor	round_1st	6.125
2	Actor	round_1st	0.375
3	Actor	round_1st	0.125
4	Actor	round_1st	0.125
5	Actor	round_1st	0.25
6	Actor	round_1st	0
7	Actor	round_1st	1.25
8	Actor	round_1st	1.75
9	Actor	round_1st	3.875
10	Actor	round_1st	0.5
11	Actor	round_1st	2.5
12	Actor	round_1st	0.125
13	Actor	round_1st	1.5
14	Actor	round_1st	0.5
15	Actor	round_1st	5.125
16	Actor	round_1st	4.375
17	Actor	round_1st	1.375
18	Actor	round_1st	5.125
19	Actor	round_1st	0.625
20	Actor	round_1st	6.875
21	Actor	round_1st	0.125
22	Actor	round_1st	0
23	Actor	round_1st	0.125
24	Actor	round_1st	3.375
25	Actor	round_1st	10
26	Actor	round_1st	0.5
27	Actor	round_1st	0.5
28	Actor	round_1st	1.25
29	Actor	round_1st	0.875
30	Actor	round_1st	0.75
31	Actor	round_1st	1
32	Actor	round_1st	5
33	Actor	round_1st	4.375
34	Actor	round_1st	0.875
35	Actor	round_1st	0.875
36	Actor	round_1st	0.375
37	Actor	round_1st	1.5
38	Actor	round_1st	6.125
39	Actor	round_1st	6.5
40	Actor	round_1st	5.75
41	Actor	round_1st	6.25
42	Actor	round_1st	4.375
43	Actor	round_1st	8.625
44	Actor	round_1st	9.75
45	Actor	round_1st	1.375
46	Actor	round_1st	1
47	Actor	round_1st	9.375
48	Actor	round_1st	7
49	Actor	round_1st	3.625
50	Actor	round_1st	0
51	Actor	round_1st	5
52	Actor	round_1st	7
53	Actor	round_1st	5
54	Actor	round_1st	1.75
55	Actor	round_1st	5.125
56	Actor	round_1st	9.75
57	Actor	round_1st	5
58	Actor	round_1st	5.125
59	Actor	round_1st	6
60	Actor	round_1st	8.375
1	Patient	round_2nd	7
2	Patient	round_2nd	0.875
3	Patient	round_2nd	0
4	Patient	round_2nd	0.375
5	Patient	round_2nd	0
6	Patient	round_2nd	0.125
7	Patient	round_2nd	1.375
8	Patient	round_2nd	1.75
9	Patient	round_2nd	2.625
10	Patient	round_2nd	0.875
11	Patient	round_2nd	4.5
12	Patient	round_2nd	0
13	Patient	round_2nd	2.75
14	Patient	round_2nd	0.25
15	Patient	round_2nd	3.125
16	Patient	round_2nd	6.75
17	Patient	round_2nd	8.125
18	Patient	round_2nd	10
19	Patient	round_2nd	1.375
20	Patient	round_2nd	8.5
21	Patient	round_2nd	0.75
22	Patient	round_2nd	2.75
23	Patient	round_2nd	0.25
24	Patient	round_2nd	3.125
25	Patient	round_2nd	10
26	Patient	round_2nd	1.375
27	Patient	round_2nd	1.5
28	Patient	round_2nd	4.625
29	Patient	round_2nd	3.375
30	Patient	round_2nd	3.125
31	Patient	round_2nd	2
32	Patient	round_2nd	7.5
33	Patient	round_2nd	6.125
34	Patient	round_2nd	1.125
35	Patient	round_2nd	3.125
36	Patient	round_2nd	0.75
37	Patient	round_2nd	1.25
38	Patient	round_2nd	6.375
39	Patient	round_2nd	6.125
40	Patient	round_2nd	6.875
41	Patient	round_2nd	8.125
42	Patient	round_2nd	6.875
43	Patient	round_2nd	8.5
44	Patient	round_2nd	10
45	Patient	round_2nd	2.125
46	Patient	round_2nd	1.375
47	Patient	round_2nd	9.5
48	Patient	round_2nd	10
49	Patient	round_2nd	6.625
50	Patient	round_2nd	4.875
51	Patient	round_2nd	5
52	Patient	round_2nd	7.875
53	Patient	round_2nd	6.25
54	Patient	round_2nd	2.375
55	Patient	round_2nd	5.75
56	Patient	round_2nd	10
57	Patient	round_2nd	5
58	Patient	round_2nd	8
59	Patient	round_2nd	10
60	Patient	round_2nd	8.375
1	Actor	round_2nd	4.875
2	Actor	round_2nd	0
3	Actor	round_2nd	0
4	Actor	round_2nd	0.125
5	Actor	round_2nd	0
6	Actor	round_2nd	0
7	Actor	round_2nd	1.125
8	Actor	round_2nd	0
9	Actor	round_2nd	2
10	Actor	round_2nd	0.5
11	Actor	round_2nd	1.5
12	Actor	round_2nd	0
13	Actor	round_2nd	2
14	Actor	round_2nd	0
15	Actor	round_2nd	1.875
16	Actor	round_2nd	4.5
17	Actor	round_2nd	2.375
18	Actor	round_2nd	2.625
19	Actor	round_2nd	0.875
20	Actor	round_2nd	6.625
21	Actor	round_2nd	0
22	Actor	round_2nd	0
23	Actor	round_2nd	0
24	Actor	round_2nd	0.25
25	Actor	round_2nd	0
26	Actor	round_2nd	0
27	Actor	round_2nd	0
28	Actor	round_2nd	0.375
29	Actor	round_2nd	0
30	Actor	round_2nd	0
31	Actor	round_2nd	1
32	Actor	round_2nd	0
33	Actor	round_2nd	3.375
34	Actor	round_2nd	0
35	Actor	round_2nd	0.5
36	Actor	round_2nd	0
37	Actor	round_2nd	1.125
38	Actor	round_2nd	3.75
39	Actor	round_2nd	1.625
40	Actor	round_2nd	4
41	Actor	round_2nd	4.25
42	Actor	round_2nd	0
43	Actor	round_2nd	4.875
44	Actor	round_2nd	3.375
45	Actor	round_2nd	0
46	Actor	round_2nd	1
47	Actor	round_2nd	3
48	Actor	round_2nd	3
49	Actor	round_2nd	2.25
50	Actor	round_2nd	0
51	Actor	round_2nd	5
52	Actor	round_2nd	5.625
53	Actor	round_2nd	0
54	Actor	round_2nd	0
55	Actor	round_2nd	3.75
56	Actor	round_2nd	7.75
57	Actor	round_2nd	5
58	Actor	round_2nd	4.625
59	Actor	round_2nd	0.875
60	Actor	round_2nd	6
