# Supplementary material for: Neural mechanisms of modulations of empathy and altruism by beliefs of others’ pain
Source: eLife. 2021 Aug 9;10:e66043. doi: 10.7554/eLife.66043 (PMC8373377; doi:10.7554/eLife.66043)
Supplement: Figure 3—source data 1. [file elife-66043-fig3-data1.csv]

subID	condition	Time	dat
1	Patient	Neutral	1
2	Patient	Neutral	2.5
3	Patient	Neutral	1.3125
4	Patient	Neutral	1.3125
5	Patient	Neutral	1
6	Patient	Neutral	1.5625
7	Patient	Neutral	2.875
8	Patient	Neutral	1.5
9	Patient	Neutral	1
10	Patient	Neutral	1
11	Patient	Neutral	1.6875
12	Patient	Neutral	1.125
13	Patient	Neutral	2.5625
14	Patient	Neutral	1.0625
15	Patient	Neutral	1.125
16	Patient	Neutral	1
17	Patient	Neutral	1
18	Patient	Neutral	1
19	Patient	Neutral	1.625
20	Patient	Neutral	1.3125
21	Patient	Neutral	2.125
22	Patient	Neutral	3.3125
23	Patient	Neutral	1.125
24	Patient	Neutral	1
25	Patient	Neutral	1.1875
26	Patient	Neutral	4.875
27	Patient	Neutral	2.4375
28	Patient	Neutral	1.0625
29	Patient	Neutral	1.875
30	Patient	Neutral	1.5
1	Patient	Pain	3.875
2	Patient	Pain	6.375
3	Patient	Pain	4.8125
4	Patient	Pain	4.1875
5	Patient	Pain	4.5625
6	Patient	Pain	5.875
7	Patient	Pain	4.625
8	Patient	Pain	7
9	Patient	Pain	5.3125
10	Patient	Pain	5.4375
11	Patient	Pain	5.75
12	Patient	Pain	4.875
13	Patient	Pain	5.625
14	Patient	Pain	3.8125
15	Patient	Pain	5.4375
16	Patient	Pain	4.9375
17	Patient	Pain	4.3125
18	Patient	Pain	4.0625
19	Patient	Pain	3.6875
20	Patient	Pain	4.4375
21	Patient	Pain	4.9375
22	Patient	Pain	4.25
23	Patient	Pain	5.625
24	Patient	Pain	5.0625
25	Patient	Pain	4
26	Patient	Pain	3.8125
27	Patient	Pain	2.5
28	Patient	Pain	3.6875
29	Patient	Pain	5.1875
30	Patient	Pain	5.875
1	Actor	Neutral	1
2	Actor	Neutral	2
3	Actor	Neutral	1.3125
4	Actor	Neutral	1
5	Actor	Neutral	1
6	Actor	Neutral	1.75
7	Actor	Neutral	1
8	Actor	Neutral	1.5
9	Actor	Neutral	1
10	Actor	Neutral	1
11	Actor	Neutral	1.1875
12	Actor	Neutral	1
13	Actor	Neutral	1.5
14	Actor	Neutral	1.1875
15	Actor	Neutral	1
16	Actor	Neutral	1
17	Actor	Neutral	1
18	Actor	Neutral	1
19	Actor	Neutral	1.5
20	Actor	Neutral	2.1875
21	Actor	Neutral	1
22	Actor	Neutral	1.75
23	Actor	Neutral	1.1875
24	Actor	Neutral	1.0625
25	Actor	Neutral	1.125
26	Actor	Neutral	2.125
27	Actor	Neutral	1
28	Actor	Neutral	1.0625
29	Actor	Neutral	1
30	Actor	Neutral	1
1	Actor	Pain	2
2	Actor	Pain	6.3125
3	Actor	Pain	4.5625
4	Actor	Pain	3.25
5	Actor	Pain	4.5625
6	Actor	Pain	6
7	Actor	Pain	3.5
8	Actor	Pain	1
9	Actor	Pain	5.125
10	Actor	Pain	4.125
11	Actor	Pain	5.0625
12	Actor	Pain	3
13	Actor	Pain	2.1875
14	Actor	Pain	3.875
15	Actor	Pain	2.5625
16	Actor	Pain	1.1875
17	Actor	Pain	3.9375
18	Actor	Pain	3
19	Actor	Pain	1.625
20	Actor	Pain	3.9375
21	Actor	Pain	3.9375
22	Actor	Pain	4.3125
23	Actor	Pain	5.1875
24	Actor	Pain	4.5625
25	Actor	Pain	1.5
26	Actor	Pain	3.125
27	Actor	Pain	5.0625
28	Actor	Pain	2.25
29	Actor	Pain	5.1875
30	Actor	Pain	4.1875
