# Supplementary material for: Neural mechanisms of modulations of empathy and altruism by beliefs of others’ pain
Source: eLife. 2021 Aug 9;10:e66043. doi: 10.7554/eLife.66043 (PMC8373377; doi:10.7554/eLife.66043)
Supplement: Figure 4—source data 1. [file elife-66043-fig4-data1.csv]

subID	condition	Time	dat
1	Lion	Neutral	1.0625
2	Lion	Neutral	1
3	Lion	Neutral	1.1875
4	Lion	Neutral	1
5	Lion	Neutral	1.375
6	Lion	Neutral	1
7	Lion	Neutral	1
8	Lion	Neutral	1.1875
9	Lion	Neutral	1
10	Lion	Neutral	1
11	Lion	Neutral	1.6875
12	Lion	Neutral	1
13	Lion	Neutral	1.5625
14	Lion	Neutral	1.8125
15	Lion	Neutral	1.3125
16	Lion	Neutral	1
17	Lion	Neutral	1.375
18	Lion	Neutral	1
19	Lion	Neutral	1.4375
20	Lion	Neutral	1
21	Lion	Neutral	1.5
22	Lion	Neutral	1
23	Lion	Neutral	1.5625
24	Lion	Neutral	1
25	Lion	Neutral	1.3125
26	Lion	Neutral	1.375
27	Lion	Neutral	1
28	Lion	Neutral	1
29	Lion	Neutral	1.4375
30	Lion	Neutral	1
1	Lion	Pain	4.6875
2	Lion	Pain	5.25
3	Lion	Pain	4.9375
4	Lion	Pain	5.25
5	Lion	Pain	6.3125
6	Lion	Pain	3.625
7	Lion	Pain	4.875
8	Lion	Pain	5.9375
9	Lion	Pain	4.8125
10	Lion	Pain	5.8125
11	Lion	Pain	5.1875
12	Lion	Pain	3.9375
13	Lion	Pain	5.75
14	Lion	Pain	5.8125
15	Lion	Pain	5.875
16	Lion	Pain	4.0625
17	Lion	Pain	5.6875
18	Lion	Pain	3.8125
19	Lion	Pain	5.9375
20	Lion	Pain	4.5625
21	Lion	Pain	4.75
22	Lion	Pain	6.875
23	Lion	Pain	3.625
24	Lion	Pain	5.75
25	Lion	Pain	5.3125
26	Lion	Pain	5.8125
27	Lion	Pain	3.8125
28	Lion	Pain	6
29	Lion	Pain	4.9375
30	Lion	Pain	4.25
1	Tiger	Neutral	1
2	Tiger	Neutral	1
3	Tiger	Neutral	1.4375
4	Tiger	Neutral	1
5	Tiger	Neutral	1
6	Tiger	Neutral	1
7	Tiger	Neutral	1
8	Tiger	Neutral	1.375
9	Tiger	Neutral	1
10	Tiger	Neutral	1
11	Tiger	Neutral	1.8125
12	Tiger	Neutral	1
13	Tiger	Neutral	1
14	Tiger	Neutral	1.125
15	Tiger	Neutral	1.1875
16	Tiger	Neutral	1
17	Tiger	Neutral	1
18	Tiger	Neutral	1
19	Tiger	Neutral	1.75
20	Tiger	Neutral	1
21	Tiger	Neutral	1
22	Tiger	Neutral	1
23	Tiger	Neutral	1.1875
24	Tiger	Neutral	1.0625
25	Tiger	Neutral	1.3125
26	Tiger	Neutral	1.0625
27	Tiger	Neutral	1.1875
28	Tiger	Neutral	1
29	Tiger	Neutral	1.3125
30	Tiger	Neutral	1.25
1	Tiger	Pain	4.6875
2	Tiger	Pain	5.6875
3	Tiger	Pain	6.0625
4	Tiger	Pain	5.875
5	Tiger	Pain	6.6875
6	Tiger	Pain	2.875
7	Tiger	Pain	5.375
8	Tiger	Pain	5.8125
9	Tiger	Pain	4.75
10	Tiger	Pain	5.9375
11	Tiger	Pain	5.4375
12	Tiger	Pain	3.8125
13	Tiger	Pain	5.6875
14	Tiger	Pain	5.375
15	Tiger	Pain	5.3125
16	Tiger	Pain	5.0625
17	Tiger	Pain	5.3125
18	Tiger	Pain	3
19	Tiger	Pain	6.4375
20	Tiger	Pain	5.1875
21	Tiger	Pain	4.25
22	Tiger	Pain	7
23	Tiger	Pain	4
24	Tiger	Pain	6
25	Tiger	Pain	5.5
26	Tiger	Pain	5.8125
27	Tiger	Pain	4.125
28	Tiger	Pain	5.5
29	Tiger	Pain	4.4375
30	Tiger	Pain	3.5625
