# Supplementary material for: Neural mechanisms of modulations of empathy and altruism by beliefs of others’ pain
Source: eLife. 2021 Aug 9;10:e66043. doi: 10.7554/eLife.66043 (PMC8373377; doi:10.7554/eLife.66043)
Supplement: Figure 4—source data 2. [file elife-66043-fig4-data2.csv]

subID	condition	dat
1	Lion	2.63
2	Lion	-0.37
3	Lion	0.41
4	Lion	1.83
5	Lion	2.08
6	Lion	1.74
7	Lion	0.42
8	Lion	0.51
9	Lion	-2.33
10	Lion	0.81
11	Lion	0.88
12	Lion	-0.17
13	Lion	0.24
14	Lion	0.79
15	Lion	0.12
16	Lion	1.86
17	Lion	1.05
18	Lion	-1.94
19	Lion	2.54
20	Lion	0.07
21	Lion	0.35
22	Lion	2.56
23	Lion	1.62
24	Lion	0.73
25	Lion	0.46
26	Lion	-1.25
27	Lion	-0.46
28	Lion	0.88
29	Lion	1.01
30	Lion	-0.66
1	Tiger	1.69
2	Tiger	0.35
3	Tiger	0.54
4	Tiger	1.39
5	Tiger	0.47
6	Tiger	-0.62
7	Tiger	0.65
8	Tiger	0.26
9	Tiger	-0.21
10	Tiger	-0.24
11	Tiger	-0.32
12	Tiger	-1.6
13	Tiger	0.35
14	Tiger	-0.06
15	Tiger	-0.07
16	Tiger	-1.18
17	Tiger	-0.18
18	Tiger	-0.27
19	Tiger	1.42
20	Tiger	0.36
21	Tiger	1.04
22	Tiger	1.04
23	Tiger	1.86
24	Tiger	2.38
25	Tiger	1.11
26	Tiger	0.63
27	Tiger	0.98
28	Tiger	2.6
29	Tiger	5.53
30	Tiger	0.25
