# Supplementary material for: Neural mechanisms of modulations of empathy and altruism by beliefs of others’ pain
Source: eLife. 2021 Aug 9;10:e66043. doi: 10.7554/eLife.66043 (PMC8373377; doi:10.7554/eLife.66043)
Supplement: Figure 5—source data 1. [file elife-66043-fig5-data1.csv]

subID	condition	Time	dat
1	Patient	round_1st	6
2	Patient	round_1st	4.13
3	Patient	round_1st	8.25
4	Patient	round_1st	7.5
5	Patient	round_1st	4.25
6	Patient	round_1st	8.25
7	Patient	round_1st	7.38
8	Patient	round_1st	7.5
9	Patient	round_1st	6
10	Patient	round_1st	8.63
11	Patient	round_1st	6.13
12	Patient	round_1st	5.63
13	Patient	round_1st	7.75
14	Patient	round_1st	6.88
15	Patient	round_1st	5.75
16	Patient	round_1st	5.75
17	Patient	round_1st	8.13
18	Patient	round_1st	7.13
19	Patient	round_1st	7.5
20	Patient	round_1st	6
21	Patient	round_1st	4.38
22	Patient	round_1st	7.75
23	Patient	round_1st	8.5
24	Patient	round_1st	7.13
25	Patient	round_1st	6.25
26	Patient	round_1st	6.38
27	Patient	round_1st	8
28	Patient	round_1st	8.5
29	Patient	round_1st	3.75
30	Patient	round_1st	5.25
1	Actor	round_1st	6.5
2	Actor	round_1st	3.25
3	Actor	round_1st	8.75
4	Actor	round_1st	7.25
5	Actor	round_1st	4.63
6	Actor	round_1st	8.38
7	Actor	round_1st	7.5
8	Actor	round_1st	8
9	Actor	round_1st	6.25
10	Actor	round_1st	9.13
11	Actor	round_1st	6.38
12	Actor	round_1st	5.75
13	Actor	round_1st	8.63
14	Actor	round_1st	7.88
15	Actor	round_1st	4.75
16	Actor	round_1st	5.63
17	Actor	round_1st	7.75
18	Actor	round_1st	6.63
19	Actor	round_1st	7.88
20	Actor	round_1st	6.75
21	Actor	round_1st	3.75
22	Actor	round_1st	7.75
23	Actor	round_1st	8.25
24	Actor	round_1st	6.38
25	Actor	round_1st	6.5
26	Actor	round_1st	5.88
27	Actor	round_1st	8.38
28	Actor	round_1st	8.63
29	Actor	round_1st	4.88
30	Actor	round_1st	5.63
1	Patient	round_2nd	6.63
2	Patient	round_2nd	5.25
3	Patient	round_2nd	8.38
4	Patient	round_2nd	7.25
5	Patient	round_2nd	3.38
6	Patient	round_2nd	7.88
7	Patient	round_2nd	6.5
8	Patient	round_2nd	7.75
9	Patient	round_2nd	7.63
10	Patient	round_2nd	8.88
11	Patient	round_2nd	6.63
12	Patient	round_2nd	6.63
13	Patient	round_2nd	7.88
14	Patient	round_2nd	6.88
15	Patient	round_2nd	4.25
16	Patient	round_2nd	6.75
17	Patient	round_2nd	7.63
18	Patient	round_2nd	8.25
19	Patient	round_2nd	6.75
20	Patient	round_2nd	7.25
21	Patient	round_2nd	4.38
22	Patient	round_2nd	5.5
23	Patient	round_2nd	8.38
24	Patient	round_2nd	7.75
25	Patient	round_2nd	5
26	Patient	round_2nd	6.63
27	Patient	round_2nd	8.5
28	Patient	round_2nd	5.5
29	Patient	round_2nd	3.5
30	Patient	round_2nd	7.63
1	Actor	round_2nd	5.5
2	Actor	round_2nd	0
3	Actor	round_2nd	3.88
4	Actor	round_2nd	4
5	Actor	round_2nd	1.63
6	Actor	round_2nd	5.5
7	Actor	round_2nd	4.25
8	Actor	round_2nd	1.38
9	Actor	round_2nd	5.88
10	Actor	round_2nd	8.63
11	Actor	round_2nd	4.63
12	Actor	round_2nd	5.88
13	Actor	round_2nd	5.5
14	Actor	round_2nd	3.5
15	Actor	round_2nd	3.63
16	Actor	round_2nd	5.5
17	Actor	round_2nd	3
18	Actor	round_2nd	4.38
19	Actor	round_2nd	5
20	Actor	round_2nd	7.38
21	Actor	round_2nd	3.13
22	Actor	round_2nd	5.63
23	Actor	round_2nd	4.63
24	Actor	round_2nd	4.5
25	Actor	round_2nd	5
26	Actor	round_2nd	3.25
27	Actor	round_2nd	2.13
28	Actor	round_2nd	3.63
29	Actor	round_2nd	2.75
30	Actor	round_2nd	3.75
