# Supplementary material for: Neural mechanisms of modulations of empathy and altruism by beliefs of others’ pain
Source: eLife. 2021 Aug 9;10:e66043. doi: 10.7554/eLife.66043 (PMC8373377; doi:10.7554/eLife.66043)
Supplement: Figure 5—source data 3. [file elife-66043-fig5-data3.csv]

subID	condition	dat
1	Patient	0.3318987
2	Patient	-0.5479707
3	Patient	-0.1715252
4	Patient	1.66586552
5	Patient	-0.4588969
6	Patient	1.3726498
7	Patient	0.86348121
8	Patient	1.2254455
9	Patient	2.1058373
10	Patient	-0.632422
11	Patient	-0.000114
12	Patient	0.35622465
13	Patient	1.91516
14	Patient	3.9685949
15	Patient	1.6023666
16	Patient	1.69684215
17	Patient	3.5617843
18	Patient	0.4301862
19	Patient	0.8551956
20	Patient	-1.25056851
21	Patient	1.6397963
22	Patient	0.0248191
23	Patient	1.0983963
24	Patient	1.3293414
25	Patient	0.20901006
26	Patient	0.2458272
27	Patient	2.8612351
28	Patient	-0.68495191
29	Patient	1.2306714
30	Patient	1.2161276
1	Actor	-0.2182727
2	Actor	0.5636615
3	Actor	0.6407791
4	Actor	0.689608
5	Actor	0.8729767
6	Actor	-0.2489863
7	Actor	1.10709196
8	Actor	0.9222474
9	Actor	-2.1082754
10	Actor	0.52103
11	Actor	0.0272603
12	Actor	-1.05521078
13	Actor	-0.4395519
14	Actor	2.1409704
15	Actor	-0.689533
16	Actor	0.23253016
17	Actor	0.6041441
18	Actor	1.2105383
19	Actor	1.1804161
20	Actor	0.07070619
21	Actor	0.2979274
22	Actor	-1.5204919
23	Actor	0.4405913
24	Actor	-0.4979809
25	Actor	0.33570659
26	Actor	-0.1563297
27	Actor	-1.6363342
28	Actor	-1.60824819
29	Actor	0.3247523
30	Actor	0.753573
