# Supplementary material for: Neural mechanisms of modulations of empathy and altruism by beliefs of others’ pain
Source: eLife. 2021 Aug 9;10:e66043. doi: 10.7554/eLife.66043 (PMC8373377; doi:10.7554/eLife.66043)
Supplement: Figure 6—source data 6. [file elife-66043-fig6-data6.csv]

subID	condition	dat
1	Patient	1.92
2	Patient	11.82
3	Patient	4.55
4	Patient	8.99
5	Patient	7.53
6	Patient	8.12
7	Patient	0.31
8	Patient	2.4
9	Patient	-5
10	Patient	-9.89
11	Patient	9.36
12	Patient	7.49
13	Patient	-9.82
14	Patient	-3.91
15	Patient	-10.77
16	Patient	-3.1
17	Patient	5.87
18	Patient	6.76
19	Patient	-10.97
20	Patient	10.31
21	Patient	-4.12
22	Patient	6.63
23	Patient	14.35
24	Patient	6.78
25	Patient	6.12
26	Patient	6.47
27	Patient	2.21
28	Patient	6.68
29	Patient	-3.68
30	Patient	3.99
31	Patient	-1.08
1	Actor	1.48
2	Actor	10.36
3	Actor	-4.73
4	Actor	5.4
5	Actor	5.7
6	Actor	2.75
7	Actor	3.33
8	Actor	1.92
9	Actor	-6.12
10	Actor	-6.23
11	Actor	3.29
12	Actor	6.58
13	Actor	-8.33
14	Actor	-1.18
15	Actor	-9.39
16	Actor	-3.53
17	Actor	3.17
18	Actor	1.86
19	Actor	-12.68
20	Actor	10.23
21	Actor	-6.29
22	Actor	5.05
23	Actor	12.14
24	Actor	6.05
25	Actor	7.76
26	Actor	4.38
27	Actor	-0.51
28	Actor	4.21
29	Actor	-0.87
30	Actor	0.02
31	Actor	1.01
